# Supplementary material for: A humanized anti-DLL4 antibody promotes dysfunctional angiogenesis and inhibits breast tumor growth
Source: PubMed Central journal article supplement (PMC4908374; doi:10.1038/srep27985), 2016-06-15
Supplement: srep27985-s1.pdf [file srep27985-s1.pdf]

# **A humanized anti-DLL4 antibody promotes dysfunctional angiogenesis and inhibit breast tumor growth**

**Xuelian Jia<sup>1</sup>, Wenyi Wang<sup>1,2</sup>, Zhuobin Xu<sup>1</sup>, Shijing Wang<sup>1</sup>, Tong Wang<sup>1</sup>, Min Wang<sup>1,\*</sup>,  
Min Wu<sup>1,\*</sup>**

<sup>1</sup> State Key Laboratory of Natural Medicines, School of Life Science & Technology, China  
Pharmaceutical University, Nanjing, Jiangsu 210009, China

<sup>2</sup> The Rutgers Center for Computational and Integrative Biology, Rutgers University, Camden,  
NJ 08102, United States

The authors Xuelian Jia and Wenyi Wang contributed equally to this work.

\* Corresponding authors. Address: China Pharmaceutical University, No. 24 Tong Jia Xiang,  
Nanjing, Jiangsu 210009, China.

Tel.: +86 25 8327 1395. Fax: +86 25 8327 1395.

Email Address: [minwang@cpu.edu.cn](mailto:minwang@cpu.edu.cn) (Min Wang), [mickeywu2001@163.com](mailto:mickeywu2001@163.com) (Min Wu).

### **Introduction of back mutations to the CDR grafting**

Canonical residues belonged to all the 3 types (e.g. VL-Y50, VH-I37) and/or with dStability most positive (e.g. VL-Y50, VL-Y72, VH-Y27, VH-I48, VH-I37) (see **Table. S1**) were back mutated with priority and the rest residues were gradually added in the later version. We designed 3 versions of back mutate VH (named as VH<sub>1</sub>, VH<sub>2</sub> and VH<sub>3</sub>) and 2 versions of back mutant VL (VL<sub>1</sub>, VL<sub>2</sub>), the amino acid sequences of which were shown in Fig. S2. VH<sub>1</sub> mutate 27G, 37V, 48M to the original murine residues, VH<sub>2</sub> further mutate 38R and 70I while VH<sub>3</sub> mutate all the 7 residues. Similarly, VL<sub>1</sub> mutate 50K, 72F and VH<sub>2</sub> mutate all the 5 residues to the original murine one. The 3 mutate VH and 2 mutate VL were combined to make 6 humanized antibodies (H<sub>1</sub>L<sub>2</sub>, H<sub>2</sub>L<sub>1</sub>, H<sub>3</sub>L<sub>1</sub>, H<sub>1</sub>L<sub>2</sub>, H<sub>2</sub>L<sub>2</sub> and H<sub>3</sub>L<sub>2</sub>).

### **Enzyme-linked immunosorbent assay (ELISA)**

ELISA was performed to test antigen binding activity of H<sub>C</sub>L<sub>C</sub> or humanized antibodies, 1 µg/ml rhDLL4 was immobilized to 96-well plates at 4 °C overnight, and then incubated with a series concentrations of purified culture supernatant at 37 °C for 1 h. Supernatant of non-transfected cells was used as vehicle control. Plates were washed and incubated with HRP conjugated goat-anti-human IgG H+L as detecting antibody. Lastly, antibody bound to the plate was determined by monitoring the absorbance difference between 450 nm and 630 nm in BioTek Synergy 2 plate reader.

These 6 humanized antibodies were constructed and expressed in CHO-s cells. As shown in Fig. S3, the affinity of humanized antibodies were analyzed by ELISA. The binding affinity of the CDR grafted antibody HgLg decreased, but was recovered by back mutation (H<sub>3</sub>L<sub>2</sub>). While the rest antibodies failed to recover the binding affinity and H<sub>2</sub>L<sub>1</sub> or H<sub>2</sub>L<sub>2</sub> even lost the binding activity.

|           | <b>Murine (wild type)</b> | <b>Mutant</b> | <b>Canonical type</b> | <b>dStability(Kcal/mol)</b> |
|-----------|---------------------------|---------------|-----------------------|-----------------------------|
| <b>VL</b> | I4                        | L4            | 2, 3                  | -0.0128                     |
|           | P47                       | L47           | 1, 2                  | -2.1287                     |
|           | W48                       | L48           | 2                     | 0.6853                      |
|           | Y50                       | K50           | 1, 2, 3               | 3.1368                      |
|           | Y72                       | F72           | 2, 3                  | 1.2154                      |
| <b>VH</b> |                           |               |                       |                             |
|           | Y27                       | G27           | 2                     | 4.1383                      |
|           | I37                       | V37           | 1, 2, 3               | 0.8707                      |
|           | K38                       | R38           | 1, 2                  | 0.7352                      |
|           | I48                       | M48           | 2, 3                  | 1.0759                      |
|           | A68                       | V68           | 2                     | -1.6471                     |
|           | L70                       | I70           | 2, 3                  | -0.9504                     |
|           | G98                       | R98           | 2                     | -1.2529                     |

**Table S1. Antibody structure stability change upon mutation.** Canonical type: 1 represents VH-VL interface core residues; 2 represents CDR loop foundation residues; 3 represents CDR loop interaction residues.

| Regions       | Templates<br>(PDB ID) | Identity or<br>Similarity (%) | Structure<br>score |
|---------------|-----------------------|-------------------------------|--------------------|
| <b>LFR</b>    | 4KQ3. L               | 66.3                          | 95.9               |
| <b>L-CDR1</b> | 3LS5. L               | 89.7                          | 91.9               |
| <b>L-CDR2</b> | 1WC7. A               | 88.8                          | 78.3               |
| <b>L-CDR3</b> | 4ETQ. B               | 83.7                          | 94.4               |
| <b>HFR</b>    | 4KQ3. H               | 90.5                          | 95.9               |
| <b>H-CDR1</b> | 4OTX. I               | 89.3                          | 97.0               |
| <b>H-CDR2</b> | 3ET9. FH              | 81.2                          | 72.9               |
| <b>H-CDR3</b> | 3UPC. F               | 45.6                          | 56.4               |

**Table S2. Structure templates for H<sub>3</sub>L<sub>2</sub> Fv homology modeling.** The overall backbone integrity of each antibody subdomain was assessed by the Structure score, below 50 of which indicates possibilities of structural issues.

#### Phage clones

|           |                |
|-----------|----------------|
| A4        | NKRNISHFKHNS   |
| B5        | NRKNISHFSHRS   |
| C5        | HLKTSRHFILR    |
| D1        | MRKKSREPFIHL   |
| D4        | KRNIEFKHIR     |
| F4        | RITKKQRHFTHQ   |
| F5        | TRKKRPPHGKHI   |
| H5        | PM.KKLRMFERHS  |
| Consensus | KK - - - HF- H |

**Fig S1. Epitope mapping of MMGZ01.** A dodecapeptide phage display library was screened against MMGZ01. The consensus residues between the positive clones were KK---HF-H. Residues with 100 % identity are marked black, and residues with or over 75 % identity are marked purple.



**Fig S3. Antigen binding capacity of back mutate antibodies analyzed by ELISA.** The chimeric antibody named as H<sub>C</sub>L<sub>C</sub> was used as reference of binding affinity. **(a)** Binding curves of H<sub>1</sub>L<sub>1</sub>, H<sub>2</sub>L<sub>1</sub> and H<sub>3</sub>L<sub>1</sub>. **(b)** Binding curves of H<sub>1</sub>L<sub>2</sub>, H<sub>2</sub>L<sub>2</sub> and H<sub>3</sub>L<sub>2</sub>. Data are shown as mean  $\pm$  SD, n = 3.
